# Supplementary material for: Vericiguat in patients with worsening chronic heart failure and preserved ejection fraction: results of the SOluble guanylate Cyclase stimulatoR in heArT failurE patientS with PRESERVED EF (SOCRATES-PRESERVED) study
Source: PubMed Central journal article supplement — Eur Heart J. 2017 Mar 22;38(15):1119–27. doi: 10.1093/eurheartj/ehw593 (PMC5400074; doi:10.1093/eurheartj/ehw593), 2017-03-22
Supplement: ehw593_supp.pdf [file ehw593_supp.pdf]

## **SUPPLEMENTARY TABLES**

**Supplementary Table 1.** Reasons for not completing treatment and exclusions from the per protocol set for analyses of primary endpoint variables.

**Supplementary Table 2** Actual dose of study treatment received on and after week 8 (Visit 4, full analysis set excluding patients with incorrectly assigned doses)

**Supplementary Table 3.** Additional baseline characteristics

**Supplementary Table 4** Sensitivity analysis: baseline correction of primary endpoint analysis (Per protocol sets)

**Supplementary Table 5** Change from baseline in primary analysis variables (per protocol analysis sets for NT-proBNP and LAV) and heart rate (full analysis set excluding patients with incorrectly assigned doses) based on heart rhythm at baseline

**Supplementary Table 6** Echocardiography (full analysis set excluding patients with incorrectly assigned doses)

**Supplementary Table 7** Biomarkers (full analysis set excluding patients with incorrectly assigned doses)

**Supplementary Methods**

**Supplementary Table 1.** Reasons for not completing treatment and exclusions from the per protocol set for analyses of primary endpoint variables.

|                                                          | Placebo | Vericiguat |    |        |           |  |
|----------------------------------------------------------|---------|------------|----|--------|-----------|--|
|                                                          |         | 1.25 mg    |    | 2.5 mg | 2.5 to 10 |  |
|                                                          |         |            |    | mg     | mg        |  |
| Randomized to receive treatment                          | 93      | 96         | 96 | 96     | 96        |  |
| Completed treatment                                      | 80      | 82         | 83 | 80     | 86        |  |
| Not completed treatment                                  | 13      | 14         | 13 | 16     | 10        |  |
| Primary reason                                           |         |            |    |        |           |  |
| Adverse event                                            | 3       | 4          | 8  | 6      | 5         |  |
| Death                                                    | 0       | 0          | 0  | 3      | 1         |  |
| Logistical difficulties                                  | 0       | 1          | 1  | 0      | 0         |  |
| Protocol decision points                                 | 1       | 3          | 0  | 0      | 0         |  |
| Protocol violation                                       | 0       | 0          | 0  | 2      | 0         |  |
| Withdrawal by patient                                    | 9       | 6          | 4  | 5      | 4         |  |
| Valid for Per protocol set for NT-proBNP*                | 73      | 77         | 78 | 57     | 60        |  |
| Excluded from analysis                                   | 20      | 19         | 18 | 39     | 36        |  |
| Non-adherence with study drug                            | 1       | 3          | 1  | 5      | 2         |  |
| Discontinued study drug >10 d before completing 12 weeks | 11      | 14         | 14 | 15     | 10        |  |
| Patient did not reach Visit 5 (day 84)                   | 13      | 14         | 13 | 16     | 10        |  |
| Visit 1 was done but no NT-proBNP value                  | 3       | 1          | 2  | 2      | 3         |  |
| Visit 5 was done but no NT-proBNP value                  | 6       | 6          | 6  | 12     | 4         |  |
| Incorrect medication assigned on Visit 3                 | 0       | 0          | 0  | 4      | 23        |  |
| Incorrect medication assigned on Visit 4                 | 0       | 0          | 0  | 19     | 24        |  |
| Concomitant nitrates or NO donors                        | 6       | 4          | 3  | 5      | 2         |  |
| Valid for Per protocol set analysis set for LAV*         | 67      | 77         | 78 | 57     | 59        |  |
| Excluded from analysis                                   | 26      | 19         | 18 | 39     | 37        |  |
| Non-adherence with study drug                            | 1       | 3          | 1  | 5      | 2         |  |
| Discontinued study drug >10 d before completing 12 weeks | 11      | 14         | 14 | 15     | 10        |  |
| Patient did not reach Visit 5 (day 84)                   | 13      | 14         | 13 | 16     | 10        |  |
| No valid LAV value at visit 1                            | 5       | 2          | 0  | 3      | 2         |  |
| No valid LAV value at visit 5                            | 13      | 9          | 7  | 11     | 6         |  |
| Incorrect medication assigned on Visit 3                 | 0       | 0          | 0  | 4      | 23        |  |
| Incorrect medication assigned on Visit 4                 | 0       | 0          | 0  | 19     | 24        |  |

---

|                                   |   |   |   |   |   |
|-----------------------------------|---|---|---|---|---|
| Concomitant nitrates or NO donors | 6 | 4 | 3 | 5 | 2 |
|-----------------------------------|---|---|---|---|---|

---

LAV, left atrial volume; NO, nitric oxide; NT-proBNP, N-terminal pro-B-type natriuretic peptide.

\*More than one reason may apply

**Supplementary Table 2.** Actual dose of study treatment received on and after week 8 (Visit 4, full analysis set excluding patients with incorrectly assigned doses)

|                               | Vericiguat     |          |           |             |              |
|-------------------------------|----------------|----------|-----------|-------------|--------------|
|                               | Placebo        | 1.25 mg  | 2.5 mg    | 2.5 to 5 mg | 2.5 to 10 mg |
| <b>Patients treated N (%)</b> | 82 (100)       | 83 (100) | 86 (100)  | 62 (100)    | 62 (100)     |
| 0 mg                          | 82 (100)       | 0        | 1 (1.2)   | 0           | 0            |
| 1.25 mg                       | 0              | 83 (100) | 1 (1.2)   | 1 (1.6)     | 0            |
| 2.5 mg                        | 0              | 0        | 84 (97.7) | 9 (14.5)    | 1 (1.6)      |
| 5 mg                          | 0              | 0        | 0         | 52 (83.9)   | 14 (22.6)    |
| 10 mg                         | 0 <sup>1</sup> | 0        | 0         | 0           | 47 (75.8)    |

Data are displayed as n (%). <sup>1</sup> Blinded sham titration to highest dose step in 77.5% of patients in placebo arm.

**Supplementary Table 3.** Additional baseline characteristics

|                                         | Vericiguat       |                  |                  |                  |                  |                  |
|-----------------------------------------|------------------|------------------|------------------|------------------|------------------|------------------|
|                                         | Placebo          | 1.25 mg          | 2.5 mg           | 2.5 mg to 5 mg   | 2.5 mg to 10 mg  | Total            |
|                                         | (n = 93)         | (n = 96)         | (n = 96)         | (n = 96)         | (n = 96)         | (n = 477)        |
| Region, N (%)                           |                  |                  |                  |                  |                  |                  |
| Eastern Europe                          | 27 (29.0%)       | 31 (32.3%)       | 27 (28.1%)       | 24 (25.0%)       | 29 (30.2%)       | 138 (28.9%)      |
| Western Europe                          | 45 (48.4%)       | 50 (52.1%)       | 42 (43.8%)       | 46 (47.9%)       | 45 (46.9%)       | 228 (47.8%)      |
| Asia/Pacific                            | 17 (18.3%)       | 9 (9.4%)         | 17 (17.7%)       | 15 (15.6%)       | 17 (17.7%)       | 75 (15.7%)       |
| North America                           | 4 (4.3%)         | 6 (6.3%)         | 10 (10.4%)       | 11 (11.5%)       | 5 (5.2%)         | 36 (7.5%)        |
| Arterial hypertension, N (%)            | 85 (91.4%)       | 86 (89.6%)       | 85 (88.5%)       | 86 (89.6%)       | 90 (93.8%)       | 432 (90.6%)      |
| Chronic kidney disease, N (%)           | 43 (46.2%)       | 48 (50.0%)       | 34 (35.4%)       | 33 (34.4%)       | 38 (39.6%)       | 196 (41.1%)      |
| LVEF at baseline, n (%)                 |                  |                  |                  |                  |                  |                  |
| ≤50%                                    | 12 (12.9)        | 13 (13.5)        | 12 (12.5)        | 13 (13.5)        | 9 (9.4)          | 59 (12.4)        |
| >50%                                    | 77 (82.8)        | 80 (83.3)        | 83 (86.5)        | 79 (82.3)        | 85 (88.5)        | 404 (84.7)       |
| Missing                                 | 4 (4.3)          | 3 (3.1)          | 1 (1.0)          | 4 (4.2)          | 2 (2.1)          | 14 (2.9)         |
| KCCQ-CSS, median (IQR)                  | 52.8 (37.5–73.7) | 58.1 (40.6–72.4) | 58.3 (39.6–75.0) | 58.9 (33.3–72.9) | 52.3 (36.5–71.4) | 55.7 (38.0–73.4) |
| EQ-5D US index score, median (IQR)      | 0.78 (0.69–0.84) | 0.77 (0.59–0.83) | 0.77 (0.59–0.84) | 0.78 (0.69–0.84) | 0.78 (0.59–0.84) | 0.78 (0.59–0.84) |
| Atrial fibrillation in baseline ECG (N) | 35               | 41               | 40               | 38               | 36               | 190              |
| NT-proBNP (n)                           | 33               | 40               | 39               | 38               | 35               | 185              |
| NT-proBNP (pg/mL), median (IQR)         | 2254 (932–3644)  | 1877 (1157–2636) | 1729 (1065–3260) | 2301 (1381–4517) | 2407 (1492–4246) | 1983 (1170–3754) |
| LAV (n)                                 | 32               | 40               | 39               | 37               | 35               | 183              |

|                                                            |                |                |                |                |                |                |
|------------------------------------------------------------|----------------|----------------|----------------|----------------|----------------|----------------|
| LAV (mL), mean (SD)                                        | 104<br>(67)    | 107<br>(54)    | 101<br>(32)    | 95<br>(27)     | 89<br>(27)     | 99<br>(44)     |
| No atrial fibrillation in baseline ECG (N)                 | 58             | 55             | 56             | 58             | 60             | 287            |
| NT-proBNP (n)                                              | 57             | 55             | 55             | 56             | 58             | 281            |
| NT-proBNP (pg/mL), median (IQR)                            | 678 (298–1661) | 616 (279–2441) | 629 (185–1743) | 577 (305–1513) | 733 (314–1593) | 650 (279–1619) |
| LAV (n)                                                    | 56             | 54             | 56             | 55             | 59             | 280            |
| LAV (mL), mean (SD)                                        | 79<br>(26)     | 74<br>(28)     | 77<br>(26)     | 76<br>(30)     | 83<br>(25)     | 78<br>(27)     |
| Initial presentation for worsening HF                      |                |                |                |                |                |                |
| Hospitalization (n)                                        | 72             | 73             | 68             | 75             | 70             | 358            |
| Time from stabilization to randomization (days), mean (SD) | 11.6 (8.8)     | 11.6 (8.7)     | 13.3 (14.3)    | 14.3 (9.0)     | 13.5 (9.9)     | 12.9 (9.0)     |
| Intravenous diuretic (n)                                   | 20             | 23             | 27             | 21             | 26             | 117            |
| Time from stabilization to randomization (days), mean (SD) | 10.6 (7.1)     | 13.0 (8.2)     | 10.7 (6.0)     | 15.5 (8.9)     | 14.2 (8.6)     | 12.8 (7.9)     |

---

ECG, electrocardiogram; EQ-5D, 5-dimension EuroQol questionnaire; IQR, interquartile range; HF, heart failure; KCCQ, Kansas City Cardiomyopathy Questionnaire; LAV, left atrial volume; LVEF, left ventricular ejection fraction; NT-proBNP, N-terminal pro-B-type natriuretic peptide; SD, standard deviation.

**Supplementary Table 4.** Primary endpoints: Model A, NT-proBNP with adjustment for baseline values. Model B, LAV with adjustment for baseline values. ANCOVA with dose group as explanatory variable and additional covariates.

| <b>Model A</b>                                                     |                                                                                                 | <b>1.25mg</b> | <b>2.5mg</b> | <b>2.5 to 5mg</b> | <b>2.5 to 10mg</b> |
|--------------------------------------------------------------------|-------------------------------------------------------------------------------------------------|---------------|--------------|-------------------|--------------------|
| Covariate:<br>baseline<br>NT-proBNP                                | Covariate effect:<br>$P < 0.0001$                                                               |               |              |                   |                    |
|                                                                    | LS-Mean Differences relative<br>to Placebo                                                      | 0.03          | 0.13         | 0.19              | 0.14               |
|                                                                    | $P$ -value                                                                                      | 0.7716        | 0.2827       | 0.1394            | 0.2541             |
| covariates:<br>baseline NT-<br>proBNP<br>A. Fib. vs.<br>No A. Fib. | Covariate effect:<br>$P < 0.0001$ (baseline NT-proBNP)<br>$P = 0.0001$ (A. Fib. vs. No A. Fib.) |               |              |                   |                    |
|                                                                    | LS-Mean Differences to<br>Placebo                                                               | 0.04          | 0.13         | 0.16              | 0.14               |
|                                                                    | $P$ -value                                                                                      | 0.7159        | 0.2743       | 0.1964            | 0.2444             |
| <b>Model B</b>                                                     |                                                                                                 | <b>1.25mg</b> | <b>2.5mg</b> | <b>2.5 to 5mg</b> | <b>2.5 to 10mg</b> |
| Covariate:<br>baseline LAV                                         | Covariate effect:<br>$P < 0.0001$                                                               |               |              |                   |                    |
|                                                                    | LS-Mean Differences to<br>Placebo                                                               | 1.24          | 0.97         | 1.83              | 1.55               |
|                                                                    | $P$ -value                                                                                      | 0.4988        | 0.5976       | 0.3559            | 0.4291             |
| covariates:<br>baseline LAV<br>A. Fib. vs.<br>No A. Fib.           | Covariate effect:<br>$P < 0.0001$<br>$P = 0.0427$                                               |               |              |                   |                    |
|                                                                    | LS-Mean Differences to<br>Placebo                                                               | 1.32          | 1.00         | 1.49              | 1.44               |
|                                                                    | $P$ -value                                                                                      | 0.4709        | 0.5836       | 0.4532            | 0.4618             |

A. Fib., atrial fibrillation; ANCOVA, analysis of covariance; LAV, left atrial volume; LS, least-squares; NT-proBNP, N-terminal pro-B-type natriuretic peptide.

**Supplementary Table 5** Change from baseline in primary analysis variables (per protocol analysis sets for NT-proBNP and LAV) and heart rate (full analysis set excluding patients with incorrectly assigned doses) based on heart rhythm at baseline

| <b>Endpoint</b>                              | <b>Dose group</b>    | <b>Heart rhythm at baseline</b> | <b>n</b> | <b>Mean change from baseline (SD)</b> |
|----------------------------------------------|----------------------|---------------------------------|----------|---------------------------------------|
| <b>LAV (mL)</b>                              | Placebo              | A.fib.                          | 28       | -5.36 (18.6)                          |
|                                              |                      | No A. Fib.                      | 39       | -1.92 (5.17)                          |
|                                              | Pooled 2.5/5/10 mg   | A.fib.                          | 89       | -1.59 (15.5)                          |
|                                              |                      | No A. Fib.                      | 105      | -1.85 (10.1)                          |
| <b>Mean log scale (SD – log scale)</b>       |                      |                                 |          |                                       |
| <b>log(NT-proBNP) (pg/mL)</b>                | Placebo              | A.fib.                          | 31       | 0.075 (0.368)                         |
|                                              |                      | No A. Fib.                      | 42       | -0.227 (0.961)                        |
|                                              | Pooled 2.5/5/10 mg   | A.fib.                          | 89       | -0.026 (0.757)                        |
|                                              |                      | No A. Fib.                      | 106      | 0.092 (0.802)                         |
| <b>LS-mean change from baseline (95% CI)</b> |                      |                                 |          |                                       |
| <b>Heart Rate (bpm)</b>                      | Placebo              | A.fib.                          |          | -1.2 (-4.9–2.5)                       |
|                                              |                      | No A. Fib.                      |          | 6.6 (3.1–10.1)                        |
|                                              | Vericiguat 2.5–10 mg | A.fib.                          |          | -3.4 (-7.4–0.5)                       |
|                                              |                      | No A. Fib.                      |          | -1.9 (-6.0–2.3)                       |

A.fib., atrial fibrillation; bpm, beats per minute; LAV, left atrial volume; LS, least-squares; NT-proBNP, N-terminal pro-B-type natriuretic peptide; SD, standard deviation



**Supplementary Table 6. Echocardiography at rest: change from baseline to Week 12**

| Measurement                                  | Placebo                                 |              |    |              |        |              |    |              | Vericiguat   |              |    |              |              |              |    |              | Regression analysis <sup>1</sup> |              |    |              |              |  |  |  |               |  |  |  |
|----------------------------------------------|-----------------------------------------|--------------|----|--------------|--------|--------------|----|--------------|--------------|--------------|----|--------------|--------------|--------------|----|--------------|----------------------------------|--------------|----|--------------|--------------|--|--|--|---------------|--|--|--|
|                                              | 1.25 mg                                 |              |    |              | 2.5 mg |              |    |              | 2.5 to 5 mg  |              |    |              | 2.5 to 10 mg |              |    |              |                                  |              |    |              |              |  |  |  |               |  |  |  |
|                                              | n                                       | BL           | n  | Change (SD)  | n      | BL           | n  | Change       | n            | BL           | n  | Change       | n            | BL           | n  | Change       | n                                | BL           | n  | Change       |              |  |  |  |               |  |  |  |
| <b>LV Structure</b>                          |                                         |              |    |              |        |              |    |              |              |              |    |              |              |              |    |              |                                  |              |    |              |              |  |  |  |               |  |  |  |
| LV end-diastolic volume (mL)                 | 89                                      | 90.9 (31.4)  | 75 | -2.69 (21.6) | 93     | 88.1 (28.6)  | 80 | -2.15 (19.7) | 95           | 87.1 (30.0)  | 81 | -1.25 (22.8) | 73           | 82.7 (28.7)  | 59 | 0.63 (15.6)  | 67                               | 90.8 (34.6)  | 59 | -0.58 (21.1) | 0.25         |  |  |  |               |  |  |  |
|                                              | <b>Difference of means vs. placebo:</b> |              |    |              |        |              |    |              | 0.55         |              |    |              | 1.44         |              |    |              | 3.32                             |              |    |              | 2.11         |  |  |  |               |  |  |  |
|                                              | <b>(95% CI of difference):</b>          |              |    |              |        |              |    |              | (-6.01-7.10) |              |    |              | (-5.60-8.48) |              |    |              | (-3.28-9.93)                     |              |    |              | (-5.26-9.47) |  |  |  | (-0.36-0.86)  |  |  |  |
| LV end-systolic volume (mL)                  | 89                                      | 39.0 (17.3)  | 75 | -1.36 (10.9) | 93     | 38.5 (14.8)  | 80 | -1.27 (9.4)  | 95           | 38.2 (17.0)  | 82 | -1.49 (11.2) | 73           | 35.6 (13.7)  | 59 | -0.41 (7.4)  | 67                               | 40.6 (19.0)  | 59 | -1.21 (10.5) | 0.06         |  |  |  |               |  |  |  |
|                                              | <b>Difference of means vs. placebo:</b> |              |    |              |        |              |    |              | 0.09         |              |    |              | -0.13        |              |    |              | 0.95                             |              |    |              | 0.15         |  |  |  |               |  |  |  |
|                                              | <b>(95% CI of difference):</b>          |              |    |              |        |              |    |              | (-3.14-3.31) |              |    |              | (-3.62-3.36) |              |    |              | (-2.33-4.22)                     |              |    |              | (-3.54-3.83) |  |  |  | (-0.24-0.36)  |  |  |  |
| LV mass index (g/m <sup>2</sup> )            | 77                                      | 124.3 (36.7) | 61 | -1.72 (16.0) | 75     | 119.5 (25.6) | 55 | -1.95 (12.1) | 77           | 128.8 (38.0) | 60 | -1.00 (15.1) | 62           | 115.9 (33.8) | 46 | -0.65 (15.1) | 54                               | 126.3 (35.9) | 45 | -1.43 (14.9) |              |  |  |  |               |  |  |  |
|                                              | <b>Difference of means vs. placebo:</b> |              |    |              |        |              |    |              | -0.24        |              |    |              | 0.72         |              |    |              | 1.07                             |              |    |              | 0.29         |  |  |  |               |  |  |  |
|                                              | <b>(95% CI of difference):</b>          |              |    |              |        |              |    |              | (-5.51-5.04) |              |    |              | (-4.89-6.33) |              |    |              | (-4.98-7.12)                     |              |    |              | (-5.78-6.35) |  |  |  |               |  |  |  |
| LVED inter-ventricular septum thickness (mm) | 77                                      | 12.9 (2.00)  | 61 | 0.004 (0.46) | 75     | 12.8 (1.79)  | 55 | -0.12 (0.44) | 77           | 13.3 (2.11)  | 60 | -0.09 (0.54) | 62           | 12.9 (2.10)  | 46 | -0.06 (0.51) | 54                               | 13.4 (2.72)  | 45 | -0.19 (0.56) | -0.01        |  |  |  |               |  |  |  |
|                                              | <b>Difference of means vs. placebo:</b> |              |    |              |        |              |    |              | -0.13        |              |    |              | -0.09        |              |    |              | -0.06                            |              |    |              | -0.19        |  |  |  |               |  |  |  |
|                                              | <b>(95% CI of difference):</b>          |              |    |              |        |              |    |              | (-0.29-0.04) |              |    |              | (-0.27-0.09) |              |    |              | (-0.25-0.13)                     |              |    |              | (-0.39-0.01) |  |  |  | (-0.03-0.005) |  |  |  |
| LVED posterior wall thickness (mm)           | 77                                      | 12.5 (1.92)  | 61 | 0.02 (0.61)  | 75     | 12.5 (1.44)  | 55 | -0.10 (0.56) | 77           | 12.9 (2.04)  | 60 | -0.08 (0.78) | 62           | 12.6 (2.07)  | 46 | -0.12 (0.55) | 54                               | 12.9 (2.44)  | 45 | -0.23 (0.83) | -0.02        |  |  |  |               |  |  |  |
|                                              | <b>Difference of means vs. placebo:</b> |              |    |              |        |              |    |              | -0.13        |              |    |              | -0.10        |              |    |              | -0.14                            |              |    |              | -0.25        |  |  |  |               |  |  |  |
|                                              | <b>(95% CI of difference):</b>          |              |    |              |        |              |    |              | (-0.34-0.09) |              |    |              | (-0.35-0.15) |              |    |              | (-0.36-0.09)                     |              |    |              | (-0.52-0.03) |  |  |  | (-0.04-0.003) |  |  |  |

**Supplementary Table 6. Echocardiography at rest: change from baseline to Week 12**

| Measurement                                | Placebo                                 |                 |    |                 |               |                 |    |                 | Vericiguat    |                 |    |                 |               |                 |    |                  | Regression analysis <sup>1</sup> |                 |    |                 |                |  |  |  |
|--------------------------------------------|-----------------------------------------|-----------------|----|-----------------|---------------|-----------------|----|-----------------|---------------|-----------------|----|-----------------|---------------|-----------------|----|------------------|----------------------------------|-----------------|----|-----------------|----------------|--|--|--|
|                                            | 1.25 mg                                 |                 |    |                 | 2.5 mg        |                 |    |                 | 2.5 to 5 mg   |                 |    |                 | 2.5 to 10 mg  |                 |    |                  |                                  |                 |    |                 |                |  |  |  |
|                                            | n                                       | BL              | n  | Change (SD)     | n             | BL              | n  | Change (SD)     | n             | BL              | n  | Change (SD)     | n             | BL              | n  | Change (SD)      | n                                | BL              | n  | Change (SD)     |                |  |  |  |
| <b>Diastolic function</b>                  |                                         |                 |    |                 |               |                 |    |                 |               |                 |    |                 |               |                 |    |                  |                                  |                 |    |                 |                |  |  |  |
| E-wave (m/sec)                             | 86                                      | 1.07<br>(0.40)  | 72 | -0.01<br>(0.23) | 93            | 0.99<br>(0.33)  | 77 | 0.05<br>(0.20)  | 94            | 0.99<br>(0.36)  | 80 | 0.02<br>(0.20)  | 72            | 1.04<br>(0.39)  | 58 | 0.08<br>(0.22)   | 63                               | 1.01<br>(0.33)  | 56 | 0.03<br>(0.21)  | 0.003          |  |  |  |
|                                            | <b>Difference of means vs. placebo:</b> |                 |    |                 | 0.06          |                 |    |                 | 0.03          |                 |    |                 | 0.09          |                 |    |                  | 0.04                             |                 |    |                 |                |  |  |  |
|                                            | <b>(95% CI of difference):</b>          |                 |    |                 | (-0.01-0.13)  |                 |    |                 | (-0.04-0.10)  |                 |    |                 | (0.02-0.17)   |                 |    |                  | (-0.03-0.12)                     |                 |    |                 | (-0.003-0.010) |  |  |  |
| A-wave (m/sec)                             | 50                                      | 0.88<br>(0.32)  | 37 | 0.03<br>(0.22)  | 52            | 0.76<br>(0.24)  | 41 | 0.08<br>(0.17)  | 51            | 0.77<br>(0.29)  | 40 | 0.03<br>(0.14)  | 38            | 0.83<br>(0.31)  | 25 | 0.04<br>(0.13)   | 30                               | 0.73<br>(0.35)  | 24 | -0.05<br>(0.21) | -0.01          |  |  |  |
|                                            | <b>Difference of means vs. placebo:</b> |                 |    |                 | 0.05          |                 |    |                 | 0.0005        |                 |    |                 | 0.01          |                 |    |                  | -0.08                            |                 |    |                 |                |  |  |  |
|                                            | <b>(95% CI of difference):</b>          |                 |    |                 | (-0.04-0.13)  |                 |    |                 | (-0.08-0.08)  |                 |    |                 | (-0.09-0.10)  |                 |    |                  | (-0.19-0.03)                     |                 |    |                 | (-0.02--0.004) |  |  |  |
| E/A ratio                                  | 50                                      | 1.26<br>(0.74)  | 37 | -0.14<br>(0.45) | 52            | 1.27<br>(0.67)  | 41 | -0.09<br>(0.40) | 51            | 1.38<br>(0.95)  | 40 | -0.08<br>(0.53) | 38            | 1.40<br>(0.94)  | 25 | -0.004<br>(0.52) | 30                               | 1.42<br>(0.77)  | 24 | 0.13<br>(0.61)  | 0.04           |  |  |  |
|                                            | <b>Difference of means vs. placebo:</b> |                 |    |                 | 0.04          |                 |    |                 | 0.05          |                 |    |                 | 0.13          |                 |    |                  | 0.26                             |                 |    |                 |                |  |  |  |
|                                            | <b>(95% CI of difference):</b>          |                 |    |                 | (-0.15-0.23)  |                 |    |                 | (-0.17-0.28)  |                 |    |                 | (-0.12-0.38)  |                 |    |                  | (-0.01-0.53)                     |                 |    |                 | (0.02-0.06)    |  |  |  |
| Deceleration time (DT, msec)               | 86                                      | 209.3<br>(59.9) | 70 | 1.31<br>(60.0)  | 92            | 198.9<br>(58.4) | 75 | 0.57<br>(55.6)  | 94            | 193.9<br>(58.8) | 80 | 3.81<br>(59.6)  | 71            | 187.8<br>(59.3) | 57 | -5.14<br>(63.0)  | 63                               | 186.6<br>(63.2) | 56 | -9.6<br>(55.1)  |                |  |  |  |
|                                            | <b>Difference of means vs. placebo:</b> |                 |    |                 | -0.74         |                 |    |                 | 2.49          |                 |    |                 | -6.45         |                 |    |                  | -10.91                           |                 |    |                 |                |  |  |  |
|                                            | <b>(95% CI of difference):</b>          |                 |    |                 | (-19.7-18.2)  |                 |    |                 | (-16.8-21.8)  |                 |    |                 | (-28.1-15.2)  |                 |    |                  | (-31.5-9.63)                     |                 |    |                 |                |  |  |  |
| Isovolumetric relaxation time (IVRT, msec) | 85                                      | 101.3<br>(31.6) | 65 | -6.32<br>(24.0) | 89            | 101.5<br>(27.8) | 69 | -3.88<br>(23.4) | 91            | 101.9<br>(26.5) | 74 | 0.24<br>(28.1)  | 71            | 93.0<br>(22.4)  | 53 | -0.61<br>(22.2)  | 59                               | 98.0<br>(27.4)  | 49 | -5.93<br>(29.3) |                |  |  |  |
|                                            | <b>Difference of means vs. placebo:</b> |                 |    |                 | 2.44          |                 |    |                 | 6.56          |                 |    |                 | 5.72          |                 |    |                  | 0.39                             |                 |    |                 |                |  |  |  |
|                                            | <b>(95% CI of difference):</b>          |                 |    |                 | (-5.67-10.55) |                 |    |                 | (-2.28-15.41) |                 |    |                 | (-2.80-14.23) |                 |    |                  | (-9.52-10.30)                    |                 |    |                 |                |  |  |  |
| Medial e' (cm/sec)                         | 88                                      | 6.48<br>(1.93)  | 74 | 0.38<br>(1.68)  | 91            | 7.18<br>(2.89)  | 76 | -0.24<br>(2.16) | 93            | 6.64<br>(2.78)  | 79 | 0.45<br>(2.17)  | 72            | 7.05<br>(2.89)  | 56 | 0.06<br>(2.16)   | 63                               | 6.80<br>(2.35)  | 55 | 0.91<br>(2.73)  | 0.079          |  |  |  |
|                                            | <b>Difference of means vs. placebo:</b> |                 |    |                 | -0.621        |                 |    |                 | 0.068         |                 |    |                 | -0.319        |                 |    |                  | 0.534                            |                 |    |                 |                |  |  |  |
|                                            | <b>(95% CI of difference):</b>          |                 |    |                 | (-1.25-0.00)  |                 |    |                 | (-0.55-0.69)  |                 |    |                 | (-0.99-0.35)  |                 |    |                  | (-0.24-1.31)                     |                 |    |                 | (0.018-0.139)  |  |  |  |

**Supplementary Table 6. Echocardiography at rest: change from baseline to Week 12**

| Measurement         | Placebo                                 |             |    |              |        |             |    |              | Vericiguat   |             |    |              |              |             |    |              | Regression analysis <sup>1</sup> |             |    |              |              |  |  |  |               |  |  |  |
|---------------------|-----------------------------------------|-------------|----|--------------|--------|-------------|----|--------------|--------------|-------------|----|--------------|--------------|-------------|----|--------------|----------------------------------|-------------|----|--------------|--------------|--|--|--|---------------|--|--|--|
|                     | 1.25 mg                                 |             |    |              | 2.5 mg |             |    |              | 2.5 to 5 mg  |             |    |              | 2.5 to 10 mg |             |    |              |                                  |             |    |              |              |  |  |  |               |  |  |  |
|                     | n                                       | BL          | n  | Change (SD)  | n      | BL          | n  | Change       | n            | BL          | n  | Change       | n            | BL          | n  | Change       | n                                | BL          | n  | Change       |              |  |  |  |               |  |  |  |
| Lateral e' (cm/sec) | 88                                      | 8.95 (2.73) | 74 | 0.15 (1.99)  | 92     | 9.59 (3.31) | 77 | 0.05 (2.98)  | 92           | 9.43 (4.14) | 79 | 0.04 (3.06)  | 73           | 9.95 (3.66) | 58 | 0.28 (2.27)  | 62                               | 9.11 (3.14) | 54 | 0.61 (2.44)  | 0.048        |  |  |  |               |  |  |  |
|                     | <b>Difference of means vs. placebo:</b> |             |    |              |        |             |    |              | -0.096       |             |    |              | -0.111       |             |    |              | 0.132                            |             |    |              | 0.461        |  |  |  |               |  |  |  |
|                     | <b>(95% CI of difference):</b>          |             |    |              |        |             |    |              | (-0.91-0.72) |             |    |              | (-0.94-0.72) |             |    |              | (-0.60-0.87)                     |             |    |              | (-0.32-1.24) |  |  |  | (-0.03-0.12)  |  |  |  |
| Medial E/e'         | 86                                      | 18.4 (9.75) | 72 | -0.70 (5.57) | 91     | 15.9 (8.24) | 76 | 0.79 (3.86)  | 93           | 16.7 (8.59) | 77 | -1.07 (4.91) | 71           | 16.4 (8.1)  | 56 | 0.64 (4.09)  | 63                               | 16.1 (7.02) | 55 | -1.02 (3.83) |              |  |  |  |               |  |  |  |
|                     | <b>Difference of means vs. placebo:</b> |             |    |              |        |             |    |              | 1.49         |             |    |              | -0.37        |             |    |              | 1.33                             |             |    |              | -0.33        |  |  |  |               |  |  |  |
|                     | <b>(95% CI of difference):</b>          |             |    |              |        |             |    |              | (-0.06-3.04) |             |    |              | (-2.07-1.32) |             |    |              | (-0.42-3.09)                     |             |    |              | (-2.06-1.41) |  |  |  |               |  |  |  |
| Lateral E/e'        | 86                                      | 13.5 (7.66) | 72 | -0.28 (3.88) | 92     | 11.5 (5.03) | 77 | 0.48 (4.40)  | 92           | 11.9 (6.55) | 77 | -0.06 (3.56) | 72           | 12.0 (7.27) | 58 | 0.47 (4.3)   | 62                               | 12.6 (6.95) | 54 | -0.08 (4.71) |              |  |  |  |               |  |  |  |
|                     | <b>Difference of means vs. placebo:</b> |             |    |              |        |             |    |              | 0.75         |             |    |              | 0.22         |             |    |              | 0.75                             |             |    |              | 0.20         |  |  |  |               |  |  |  |
|                     | <b>(95% CI of difference):</b>          |             |    |              |        |             |    |              | (-0.59-2.10) |             |    |              | (-0.98-1.43) |             |    |              | (-0.67-2.17)                     |             |    |              | (-1.32-1.71) |  |  |  |               |  |  |  |
| PV S (m/sec)        | 46                                      | 0.45 (0.17) | 25 | 0.01 (0.12)  | 48     | 0.46 (0.17) | 29 | -0.02 (0.14) | 57           | 0.45 (0.19) | 31 | 0.02 (0.21)  | 41           | 0.45 (0.17) | 18 | -0.03 (0.19) | 35                               | 0.45 (0.18) | 21 | -0.02 (0.15) |              |  |  |  |               |  |  |  |
|                     | <b>Difference of means vs. placebo:</b> |             |    |              |        |             |    |              | -0.03        |             |    |              | 0.01         |             |    |              | -0.04                            |             |    |              | -0.03        |  |  |  |               |  |  |  |
|                     | <b>(95% CI of difference):</b>          |             |    |              |        |             |    |              | (-0.10-0.04) |             |    |              | (-0.08-0.11) |             |    |              | (-0.13-0.06)                     |             |    |              | (-0.11-0.05) |  |  |  |               |  |  |  |
| PV D (m/sec)        | 62                                      | 0.62 (0.28) | 39 | -0.04 (0.27) | 65     | 0.58 (0.22) | 44 | -0.03 (0.24) | 72           | 0.59 (0.26) | 52 | 0.07 (0.21)  | 59           | 0.66 (0.26) | 42 | 0.03 (0.16)  | 47                               | 0.62 (0.22) | 36 | 0.05 (0.20)  |              |  |  |  |               |  |  |  |
|                     | <b>Difference of means vs. placebo:</b> |             |    |              |        |             |    |              | 0.01         |             |    |              | 0.11         |             |    |              | 0.07                             |             |    |              | 0.10         |  |  |  |               |  |  |  |
|                     | <b>(95% CI of difference):</b>          |             |    |              |        |             |    |              | (-0.10-0.12) |             |    |              | (0.01-0.22)  |             |    |              | (-0.03-0.17)                     |             |    |              | (-0.01-0.21) |  |  |  |               |  |  |  |
| PV Ar (m/sec)       | 34                                      | 0.27 (0.11) | 17 | 0.01 (0.11)  | 29     | 0.27 (0.08) | 17 | 0.01 (0.07)  | 33           | 0.25 (0.06) | 24 | 0.02 (0.08)  | 25           | 0.26 (0.06) | 14 | 0.001 (0.06) | 18                               | 0.26 (0.08) | 14 | -0.01 (0.05) | -0.003       |  |  |  |               |  |  |  |
|                     | <b>Difference of means vs. placebo:</b> |             |    |              |        |             |    |              | 0.01         |             |    |              | 0.02         |             |    |              | -0.004                           |             |    |              | -0.01        |  |  |  |               |  |  |  |
|                     | <b>(95% CI of difference):</b>          |             |    |              |        |             |    |              | (-0.06-0.07) |             |    |              | (-0.04-0.08) |             |    |              | (-0.07-0.06)                     |             |    |              | (-0.08-0.05) |  |  |  | (-0.01-0.002) |  |  |  |

**Supplementary Table 6. Echocardiography at rest: change from baseline to Week 12**

| Measurement                                                 | Placebo                                 |             |    |              |        |             |    |              | Vericiguat   |             |    |               |              |             |    |              | Regression analysis <sup>1</sup> |             |              |               |              |  |               |
|-------------------------------------------------------------|-----------------------------------------|-------------|----|--------------|--------|-------------|----|--------------|--------------|-------------|----|---------------|--------------|-------------|----|--------------|----------------------------------|-------------|--------------|---------------|--------------|--|---------------|
|                                                             | 1.25 mg                                 |             |    |              | 2.5 mg |             |    |              | 2.5 to 5 mg  |             |    |               | 2.5 to 10 mg |             |    |              |                                  |             |              |               |              |  |               |
|                                                             | n                                       | BL          | n  | Change (SD)  | n      | BL          | n  | Change (SD)  | n            | BL          | n  | Change (SD)   | n            | BL          | n  | Change (SD)  |                                  |             |              |               |              |  |               |
| <b>Systemic and vascular</b>                                |                                         |             |    |              |        |             |    |              |              |             |    |               |              |             |    |              |                                  |             |              |               |              |  |               |
| Left ventricular stroke volume (mL)                         | 89                                      | 51.8 (17.4) | 75 | -1.34 (13.2) | 93     | 49.6 (16.8) | 80 | -0.88 (11.2) | 95           | 48.9 (15.3) | 81 | 0.14 (12.2)   | 73           | 47.1 (17.4) | 59 | 1.04 (9.1)   | 67                               | 50.3 (17.6) | 59           | 0.63 (12.8)   | 0.19         |  |               |
|                                                             | <b>Difference of means vs. placebo:</b> |             |    |              |        |             |    |              | 0.46         |             |    |               |              |             |    |              | 1.47                             | 2.38        | 1.96         |               |              |  |               |
|                                                             | <b>(95% CI of difference):</b>          |             |    |              |        |             |    |              | (-3.41–4.33) |             |    |               |              |             |    |              | (-2.54–5.48)                     |             | (-1.60–6.35) |               | (-2.51–6.44) |  | (-0.16–0.54)  |
| Aortic valve – velocity time integral – antegrade flow (cm) | 86                                      | 37.2 (14.9) | 70 | -0.20 (7.61) | 87     | 31.8 (10.9) | 70 | 0.76 (7.26)  | 89           | 32.6 (11.9) | 75 | -0.85 (10.38) | 72           | 32.9 (12.1) | 55 | 0.42 (6.86)  | 63                               | 32.0 (11.5) | 55           | 2.05 (5.38)   |              |  |               |
|                                                             | <b>Difference of means vs. placebo:</b> |             |    |              |        |             |    |              | 0.96         |             |    |               |              |             |    |              | -0.65                            |             | 0.62         |               | 2.25         |  |               |
|                                                             | <b>(95% CI of difference):</b>          |             |    |              |        |             |    |              | (-1.53–3.44) |             |    |               |              |             |    |              | (-3.65–2.35)                     |             | (-1.98–3.21) |               | (-0.15–4.64) |  |               |
| Systemic arterial compliance (SAC, mL/mmHg)                 | 89                                      | 0.89 (0.35) | 74 | -0.04 (0.27) | 93     | 0.87 (0.35) | 80 | -0.02 (0.28) | 94           | 0.9 (0.39)  | 79 | -0.01 (0.39)  | 70           | 0.83 (0.34) | 56 | 0.07 (0.33)  | 67                               | 0.89 (0.38) | 59           | -0.002 (0.42) | 0.005        |  |               |
|                                                             | <b>Difference of means vs. placebo:</b> |             |    |              |        |             |    |              | 0.02         |             |    |               |              |             |    |              | 0.02                             |             | 0.11         |               | 0.04         |  |               |
|                                                             | <b>(95% CI of difference):</b>          |             |    |              |        |             |    |              | (-0.07–0.11) |             |    |               |              |             |    |              | (-0.08–0.13)                     |             | (0.00–0.21)  |               | (-0.08–0.16) |  | (-0.005,0.01) |
| Effective arterial elastance (E <sub>a</sub> , mmHg/mL)     | 89                                      | 2.57 (0.97) | 74 | 0.13 (0.79)  | 93     | 2.67 (0.93) | 80 | 0.08 (0.87)  | 94           | 2.66 (0.98) | 79 | -0.05 (0.75)  | 71           | 2.76 (1.09) | 57 | -0.07 (0.92) | 67                               | 2.64 (0.84) | 59           | -0.05 (0.71)  | -0.01        |  |               |
|                                                             | <b>Difference of means vs. placebo:</b> |             |    |              |        |             |    |              | -0.04        |             |    |               |              |             |    |              | -0.18                            |             | -0.19        |               | -0.18        |  |               |
|                                                             | <b>(95% CI of difference):</b>          |             |    |              |        |             |    |              | (-0.31–0.22) |             |    |               |              |             |    |              | (-0.42–0.07)                     |             | (-0.49–0.10) |               | (-0.44–0.08) |  | (-0.04–0.01)  |
| LVES elastance (E <sub>es</sub> , mmHg/mL)                  | 80                                      | 1.32 (0.74) | 63 | 0.12 (0.61)  | 84     | 1.3 (0.70)  | 70 | 0.01 (0.56)  | 93           | 1.31 (0.69) | 75 | -0.07 (0.54)  | 67           | 1.47 (0.74) | 51 | 0.03 (0.65)  | 58                               | 1.49 (0.88) | 50           | -0.16 (0.73)  | -0.01        |  |               |
|                                                             | <b>Difference of means vs. placebo:</b> |             |    |              |        |             |    |              | -0.11        |             |    |               |              |             |    |              | -0.20                            |             | -0.09        |               | -0.28        |  |               |
|                                                             | <b>(95% CI of difference):</b>          |             |    |              |        |             |    |              | (-0.31–0.09) |             |    |               |              |             |    |              | (-0.39–0.00)                     |             | (-0.33–0.14) |               | (-0.53–0.03) |  | (-0.03–0.005) |
| E <sub>a</sub> /E <sub>es</sub>                             | 80                                      | 2.59 (2.22) | 63 | 0.37 (5.75)  | 84     | 1.86 (3.35) | 70 | -0.24 (3.55) | 93           | 2.71 (5.8)  | 75 | -1.29 (6.85)  | 67           | 2.01 (2.64) | 51 | 0.52 (3.48)  | 58                               | 1.68 (9.49) | 50           | 1.53 (11.1)   |              |  |               |
|                                                             | <b>Difference of means vs. placebo:</b> |             |    |              |        |             |    |              | -0.61        |             |    |               |              |             |    |              | -1.67                            |             | 0.14         |               | 1.16         |  |               |
|                                                             | <b>(95% CI of difference):</b>          |             |    |              |        |             |    |              | (-2.23–1.01) |             |    |               |              |             |    |              | (-3.82–0.49)                     |             | (-1.67–1.96) |               | (-2.05–4.36) |  |               |

Supplementary Table 6. Echocardiography at rest: change from baseline to Week 12

| Measurement                  | Placebo                                 |             |    |             |        |             |    |             | Vericiguat   |             |    |             |              |             |    |              | Regression analysis <sup>1</sup> |             |    |              |              |  |  |  |
|------------------------------|-----------------------------------------|-------------|----|-------------|--------|-------------|----|-------------|--------------|-------------|----|-------------|--------------|-------------|----|--------------|----------------------------------|-------------|----|--------------|--------------|--|--|--|
|                              | 1.25 mg                                 |             |    |             | 2.5 mg |             |    |             | 2.5 to 5 mg  |             |    |             | 2.5 to 10 mg |             |    |              |                                  |             |    |              |              |  |  |  |
|                              | n                                       | BL          | n  | Change (SD) | n      | BL          | n  | Change      | n            | BL          | n  | Change      | n            | BL          | n  | Change       | n                                | BL          | n  | Change       |              |  |  |  |
| <b>Right heart</b>           |                                         |             |    |             |        |             |    |             |              |             |    |             |              |             |    |              |                                  |             |    |              |              |  |  |  |
| Right atrial pressure (mmHg) | 66                                      | 7.35 (4.06) | 41 | 0.81 (3.43) | 74     | 6.93 (3.34) | 43 | 0.72 (3.75) | 74           | 7.39 (3.87) | 51 | 0.33 (3.76) | 52           | 9.25 (4.23) | 31 | -0.03 (3.53) | 55                               | 8.35 (4.23) | 34 | 0.03 (3.88)  |              |  |  |  |
|                              | <b>Difference of means vs. placebo:</b> |             |    |             |        |             |    |             | -0.08        |             |    |             | -0.47        |             |    |              | -0.84                            |             |    |              | -0.78        |  |  |  |
|                              | <b>(95% CI of difference):</b>          |             |    |             |        |             |    |             | (-1.65–1.48) |             |    |             | (-1.98–1.03) |             |    |              | (-2.48–0.81)                     |             |    |              | (-2.46–0.91) |  |  |  |
| TAPSE (mm)                   | 86                                      | 18.9 (3.99) | 70 | 0.04 (2.52) | 89     | 19.1 (4.16) | 73 | 0.36 (2.47) | 91           | 18.5 (4.10) | 73 | 0.01 (2.89) | 71           | 18.6 (4.85) | 56 | 0.02 (2.43)  | 62                               | 18.2 (4.13) | 54 | 0.78 (2.39)  |              |  |  |  |
|                              | <b>Difference of means vs. placebo:</b> |             |    |             |        |             |    |             | 0.32         |             |    |             | -0.03        |             |    |              | -0.02                            |             |    |              | 0.74         |  |  |  |
|                              | <b>(95% CI of difference):</b>          |             |    |             |        |             |    |             | (-0.51–1.14) |             |    |             | (-0.93–0.87) |             |    |              | (-0.90–0.86)                     |             |    |              | (-0.14–1.63) |  |  |  |
| RVFAC (%)                    | 50                                      | 40.5 (7.97) | 28 | 0.38 (4.52) | 53     | 40.5 (7.66) | 33 | 0.29 (4.50) | 60           | 38.4 (8.93) | 37 | 1.7 (4.08)  | 52           | 40.4 (8.17) | 33 | 0.25 (3.34)  | 42                               | 38.5 (9.45) | 28 | -1.24 (4.90) |              |  |  |  |
|                              | <b>Difference of means vs. placebo:</b> |             |    |             |        |             |    |             | -0.09        |             |    |             | 1.33         |             |    |              | -0.13                            |             |    |              | -1.62        |  |  |  |
|                              | <b>(95% CI of difference):</b>          |             |    |             |        |             |    |             | (-2.41–2.23) |             |    |             | (-0.81–3.47) |             |    |              | (-2.15–1.89)                     |             |    |              | (-4.14–0.91) |  |  |  |
| RVSP (mmHg)                  | 56                                      | 40.8 (13.9) | 30 | 1.15 (11.3) | 66     | 39.5 (13.8) | 38 | 3.42 (12.2) | 67           | 38.3 (13.6) | 40 | 3.17 (9.5)  | 43           | 48.2 (15.9) | 26 | -2.15 (13.1) | 45                               | 45.9 (13.7) | 26 | 0.87 (14.9)  |              |  |  |  |
|                              | <b>Difference of means vs. placebo:</b> |             |    |             |        |             |    |             | 2.27         |             |    |             | 2.02         |             |    |              | -3.3                             |             |    |              | -0.28        |  |  |  |
|                              | <b>(95% CI of difference):</b>          |             |    |             |        |             |    |             | (-3.48–8.02) |             |    |             | (-2.94–6.97) |             |    |              | (-9.83–3.24)                     |             |    |              | (-7.30–6.73) |  |  |  |

**Supplementary Table 6. Echocardiography at rest: change from baseline to Week 12**

| Measurement | Placebo |    |        |             | Vericiguat  |    |             |        |   |    |   |        | Regression analysis <sup>1</sup> |    |   |        |
|-------------|---------|----|--------|-------------|-------------|----|-------------|--------|---|----|---|--------|----------------------------------|----|---|--------|
|             | 1.25 mg |    | 2.5 mg |             | 2.5 to 5 mg |    | 2.5 to10 mg |        |   |    |   |        |                                  |    |   |        |
|             | n       | BL | n      | Change (SD) | n           | BL | n           | Change | n | BL | n | Change | n                                | BL | n | Change |

A, late ventricular filling; BL, baseline; CI, confidence interval; D, diastolic peak velocity – antegrade flow, Ar, atrial reversal peak velocity; DT, deceleration time; E, mitral valve early diastolic filling - antegrade flow; e', mitral valve annulus - peak early diastolic tissue velocity; ES, end-systolic; FAS, full analysis set; IVRT, isovolumetric relaxation time; LV, left ventricular: LVED, left ventricular end-diastolic; LVES, left ventricular end-systolic; PV, pulmonary veins; RVFAC, right ventricular fractional area change; RVSP, right ventricular systolic peak gradient; S, systolic peak velocity – antegrade flow; SD, standard deviation; TAPSE, tricuspid annular plane systolic excursion.

<sup>1</sup> Linear regression with dose group as explanatory variable and baseline value as additional covariate

**Supplementary Table 7. Summary statistics for efficacy biomarkers and change from baseline to Week 12 (full analysis set excluding patients with incorrectly assigned doses)**

| Biomarker           | Placebo                                                 |                    |    |                    | Vericiguat    |              |    |               |                |                    |    |               |               |                    |    |                |                |                    |    |               |
|---------------------|---------------------------------------------------------|--------------------|----|--------------------|---------------|--------------|----|---------------|----------------|--------------------|----|---------------|---------------|--------------------|----|----------------|----------------|--------------------|----|---------------|
|                     | n                                                       |                    | BL |                    | 1.25 mg       |              |    |               | 2.5 mg         |                    |    |               | 2.5 to 5 mg   |                    |    |                | 2.5 to 10 mg   |                    |    |               |
|                     | n                                                       | BL                 | n  | Change (SD)        | n             | BL           | n  | Change        | n              | BL                 | n  | Change        | n             | BL                 | n  | Change         | n              | BL                 | n  | Change        |
| Osteopontin (ng/mL) | 91                                                      | 53.9 (40.8)        | 79 | 3.60 (39.7)        | 95            | 59.5 (51.3)  | 80 | 9.33 (55.2)   | 93             | 48.1 (47.7)        | 79 | 4.33 (45.2)   | 75            | 50.7 (40.4)        | 60 | 12.8 (44.7)    | 68             | 42.3 (31.5)        | 60 | 6.31 (35.4)   |
| Median (IQR)        |                                                         | 44.9 (20.0–81.1)   |    | 50.1 (20.0–81.3)   |               |              |    |               |                | 20.0 (20.0–62.9)   |    |               |               | 44.3 (20.0–71.9)   |    |                |                | 20.0 (20.0–55.6)   |    |               |
|                     | <b>Difference of means vs. placebo:</b>                 |                    |    |                    | 5.73          |              |    |               | 0.73           |                    |    |               | 9.15          |                    |    |                | 2.71           |                    |    |               |
|                     | <b>(95% CI of difference):</b>                          |                    |    |                    | (-9.36–20.81) |              |    |               | (-12.64–14.10) |                    |    |               | (-5.06–23.36) |                    |    |                | (-10.13–15.55) |                    |    |               |
| TIMP-4* (log pg/mL) | 90                                                      | 7.88 (0.46)        | 78 | -0.023 (0.399)     | 94            | 7.90 (0.504) | 80 | 0.026 (0.390) | 93             | 7.86 (0.45)        | 81 | 0.077 (0.405) | 75            | 7.95 (0.43)        | 60 | -0.014 (0.450) | 68             | 7.89 (0.38)        | 61 | 0.013 (0.370) |
|                     | <b>Difference of log-transformed means vs. placebo:</b> |                    |    |                    | 0.048         |              |    |               | 0.099          |                    |    |               | 0.008         |                    |    |                | 0.035          |                    |    |               |
|                     | <b>(95% CI of difference):</b>                          |                    |    |                    | (-0.07–0.17)  |              |    |               | (-0.03–0.22)   |                    |    |               | (-0.13–0.15)  |                    |    |                | (-0.09–0.16)   |                    |    |               |
| cGMP (pmol/mL)      | 91                                                      | 152.9 (99.2)       | 79 | 10.3 (113.7)       | 95            | 165.7 (95.8) | 80 | 11.1 (99)     | 93             | 162.3 (104.8)      | 79 | 19.4 (146)    | 75            | 148.5 (102.5)      | 60 | 17.7 (135.8)   | 68             | 148.7 (115)        | 60 | 40.2 (156.4)  |
| Median (IQR)        |                                                         | 146.5 (79.9–196.8) |    | 156.9 (93.0–219.1) |               |              |    |               |                | 146.0 (96.0–200.8) |    |               |               | 116.2 (73.4–190.8) |    |                |                | 117.3 (74.8–184.7) |    |               |
|                     | <b>Difference of means vs. placebo:</b>                 |                    |    |                    | 0.88          |              |    |               | 9.19           |                    |    |               | 7.45          |                    |    |                | 29.97          |                    |    |               |
|                     | <b>(95% CI of difference):</b>                          |                    |    |                    | (-32.5–34.3)  |              |    |               | (-31.9–50.3)   |                    |    |               | (-34.4–49.3)  |                    |    |                | (-15.3–75.3)   |                    |    |               |
| PIIINP (µg/L)       | 91                                                      | 10.2 (6.91)        | 79 | 0.05 (3.67)        | 93            | 11.0 (6.39)  | 79 | -0.56 (4.69)  | 92             | 11.2 (9.39)        | 80 | -1.41 (7.07)  | 74            | 12.1 (13.38)       | 58 | -1.72 (13.22)  | 68             | 12.1 (10.98)       | 61 | -0.91 (7.90)  |
| Median (IQR)        |                                                         | 8.9 (6.5–11.7)     |    | 9.2 (7.0–13.1)     |               |              |    |               |                | 8.2 (6.2–12.4)     |    |               |               | 9.6 (6.7–13.7)     |    |                |                | 9.3 (7.5–13.2)     |    |               |
|                     | <b>Difference of means vs. placebo:</b>                 |                    |    |                    | -0.61         |              |    |               | -1.46          |                    |    |               | -1.77         |                    |    |                | -0.96          |                    |    |               |
|                     | <b>(95% CI of difference):</b>                          |                    |    |                    | (-1.93–0.71)  |              |    |               | (-3.22–0.31)   |                    |    |               | (-4.85–1.32)  |                    |    |                | (-2.95–1.03)   |                    |    |               |

**Supplementary Table 7. Summary statistics for efficacy biomarkers and change from baseline to Week 12 (full analysis set excluding patients with incorrectly assigned doses)**

| Biomarker           | Placebo                                                                |              |                 |                | Vericiguat         |             |                 |               |                    |             |    |                |                     |              |    |               |                     |             |    |               |
|---------------------|------------------------------------------------------------------------|--------------|-----------------|----------------|--------------------|-------------|-----------------|---------------|--------------------|-------------|----|----------------|---------------------|--------------|----|---------------|---------------------|-------------|----|---------------|
|                     | n                                                                      |              | BL              |                | 1.25 mg            |             |                 |               | 2.5 mg             |             |    |                | 2.5 to 5 mg         |              |    |               | 2.5 to 10 mg        |             |    |               |
|                     | n                                                                      | BL           | n               | Change (SD)    | n                  | BL          | n               | Change        | n                  | BL          | n  | Change         | n                   | BL           | n  | Change        | n                   | BL          | n  | Change        |
| GDF-15* (log pg/mL) | 91                                                                     | 7.86 (0.65)  | 79              | -0.015 (0.380) | 95                 | 7.82 (0.57) | 80              | 0.048 (0.394) | 93                 | 7.71 (0.66) | 79 | -0.007 (0.377) | 75                  | 7.89 (0.64)  | 60 | 0.010 (0.439) | 68                  | 7.73 (0.71) | 60 | 0.025 (0.346) |
|                     | <b>Difference of log-transformed means vs. (95% CI of difference):</b> |              |                 |                | 0.063 (-0.06–0.18) |             |                 |               | 0.008 (-0.11–0.13) |             |    |                | 0.114 (-0.02–0.25)  |              |    |               | 0.039 (-0.08–0.16)  |             |    |               |
| sST2* (log pg/mL)   | 90                                                                     | 10.03 (0.58) | 78              | 0.084 (0.608)  | 94                 | 9.92 (0.63) | 80              | 0.131 (0.622) | 93                 | 9.96 (0.69) | 81 | 0.182 (0.575)  | 75                  | 10.04 (0.61) | 60 | 0.046 (0.554) | 68                  | 9.96 (0.80) | 61 | 0.051 (0.618) |
|                     | <b>Difference of log-transformed means vs. (95% CI of difference):</b> |              |                 |                | -0.48 (-0.15–0.24) |             |                 |               | 0.098 (-0.09–0.28) |             |    |                | -0.038 (-0.24–0.16) |              |    |               | -0.032 (-0.24–0.17) |             |    |               |
| Gal-3 (pg/mL)       | 90                                                                     | 15.2 (10.60) | 78              | -2.22 (8.21)   | 93                 | 14.0 (6.37) | 79              | -0.16 (7.33)  | 91                 | 12.6 (5.77) | 79 | -0.70 (3.81)   | 75                  | 15.5 (11.09) | 60 | 1.26 (11.14)  | 68                  | 12.9 (7.72) | 61 | -2.01 (6.60)  |
| Median (IQR)        | 13.4 (8.6–18.8)                                                        |              | 14.1 (8.4–17.6) |                | 12.6 (7.9–15.9)    |             | 13.8 (8.6–19.2) |               | 11.6 (7.7–15.8)    |             |    |                |                     |              |    |               |                     |             |    |               |
|                     | <b>Difference of means vs. placebo: (95% CI of difference):</b>        |              |                 |                | 2.06 (-0.40–4.51)  |             |                 |               | 1.52 (-0.49–3.53)  |             |    |                | 3.48 (0.22–6.73)    |              |    |               | 0.21 (-2.34–2.76)   |             |    |               |

BL, baseline; cGMP, cyclic guanosine monophosphate; CI, confidence interval; Gal-3, Galectin-3; GDF-15, growth differentiation factor 15; PIIINP, N-terminal pro-collagen III propeptide; SD, standard deviation; sST2, soluble suppression of tumorigenicity; TIMP-4, tissue metalloproteinase inhibitor 4.

Analyses were only performed if at least 2 patients per subgroup/treatment combination were available for analysis.

\*Data were log-transformed to derive normal distribution of data.



## **Supplementary Methods.**

Patients received background therapy for comorbidities at the physician's discretion. Total treatment duration was 12 weeks, followed by a safety follow-up visit 16 weeks after randomization.

### Statistical methods:

Two secondary analyses of the two primary endpoints were pre-specified: pairwise comparisons of each individual vericiguat treatment group with placebo, to be tested hierarchically with two-sample t-tests at the one-sided significance level  $\alpha = 2.5\%$ , from highest to lowest treatment group, in case a positive result for the respective endpoint was observed in the respective primary analysis of the respective endpoint. In addition, a linear regression analysis across all dose arms was specified to check for a general trend of dose-response. If the primary analysis of a primary endpoint was non-significant, the corresponding secondary analyses were to be deemed exploratory.

Several transformations of biomarker endpoints were assessed with QQ-plots and Kolmogoroff-Smirnov goodness-of-fit tests to derive approximately normally distributed data (data not shown). For GDF-15, sST2 and TIMP-4, the log-transformation resulted in approximately normally distributed changes from baseline and comparisons are hence displayed on the log-transformed scale.
